# Supplementary material for: EpCAMhigh and EpCAMlow circulating tumor cells in metastatic prostate and breast cancer patients
Source: PubMed Central journal article supplement (PMC6235023; doi:10.18632/oncotarget.26298), 2018-11-02
Supplement: oncotarget-09-35705-s001.pdf [file oncotarget-09-35705-s001.pdf]

## EpCAM<sup>high</sup> and EpCAM<sup>low</sup> circulating tumor cells in metastatic prostate and breast cancer patients

### SUPPLEMENTARY MATERIALS

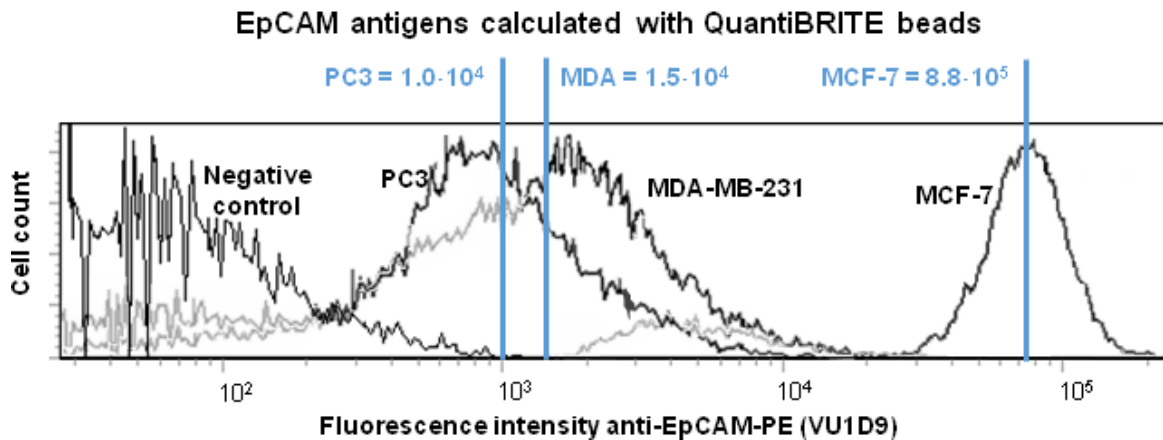

**Supplementary Figure 1: Distribution of EpCAM density on cancer cell lines.** Histograms showing the distribution of EpCAM density of cancer cell line PC3, MDA-MB-231 and MCF-7 cells, as well as a negative control. The actual number of antigens (blue) was determined by the use of QuantiBRITE beads (BD Bioscience). The average EpCAM density of PC3 is  $1.0 \times 10^4$  antigens with 89% CV. The average EpCAM density of MDA-MB-231 is  $1.5 \times 10^4$  antigens with a CV of 165%. The average EpCAM density of MCF-7 is  $8.8 \times 10^5$  antigens with a CV of 62%.

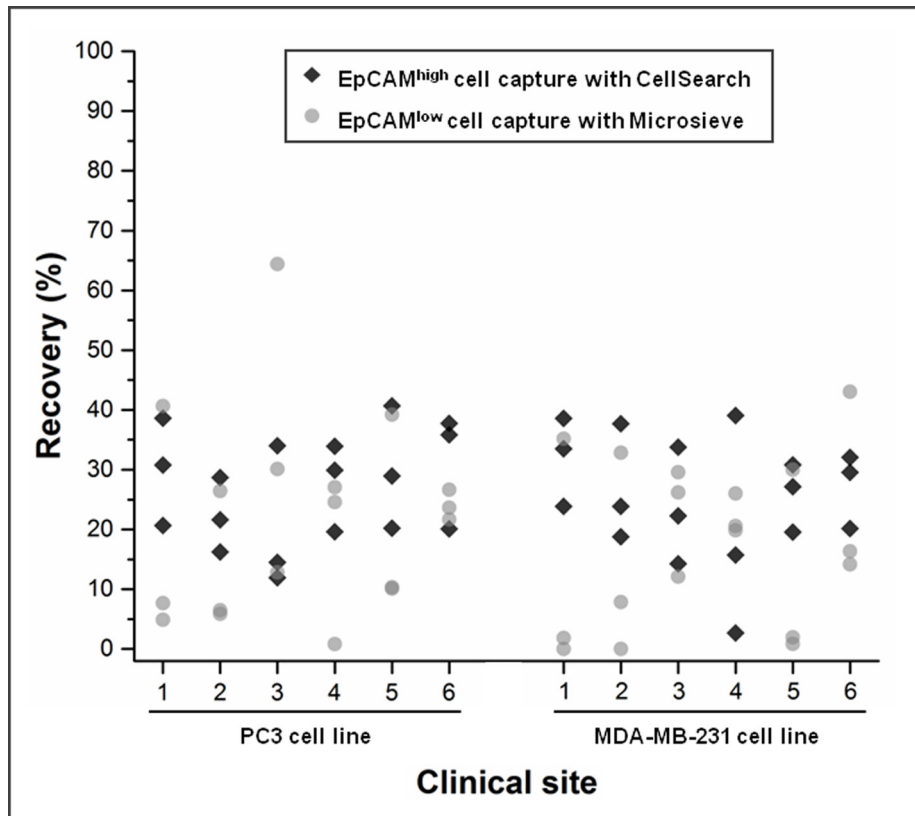

**Supplementary Figure 2: Recovery of PC3 and MDA-MB-231 cells per clinical site.** Scatter plot displaying the recovery (%) of PC3 and MDA-MB-231 cells of each processed sample with CellSearch and microsieves per clinical site.

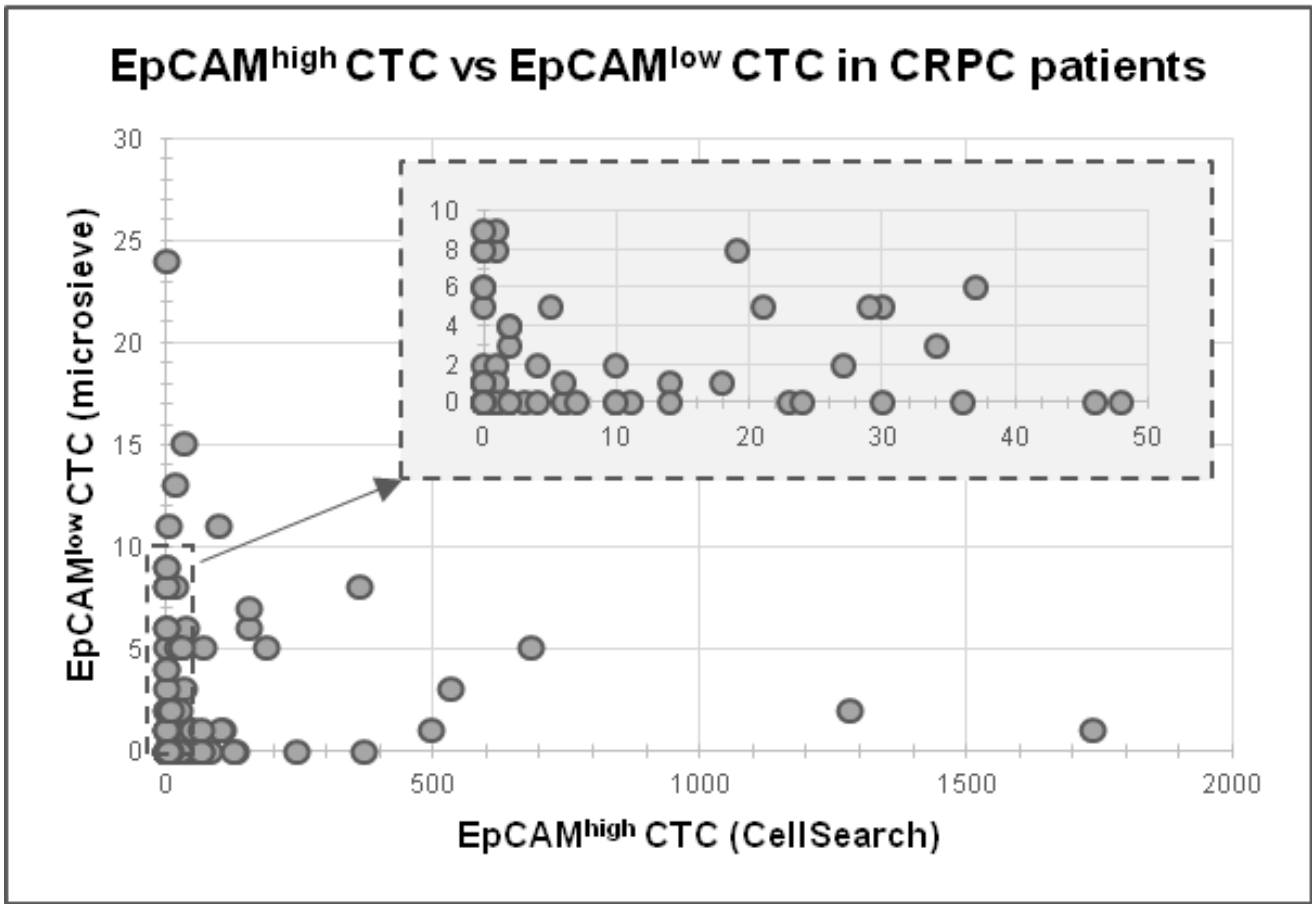

**Supplementary Figure 3: CTC counts in 91 CRPC patients.** Scatter plot of EpCAM<sup>high</sup> and EpCAM<sup>low</sup> CTC counts in 91 castration-resistant prostate cancer patients.

### A Combined EpCAM<sup>high</sup> & EpCAM<sup>low</sup> CTC

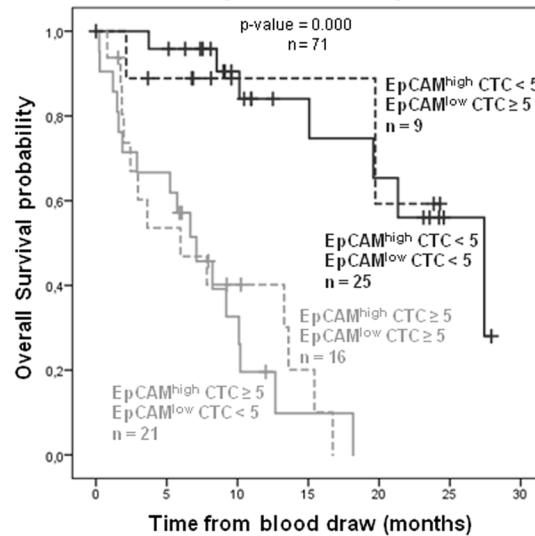

### B ROC Curve

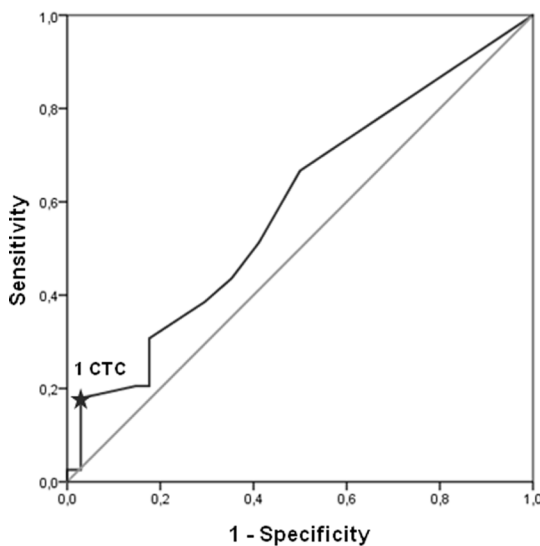

### C EpCAM<sup>low</sup> CTC with threshold ≥ 1

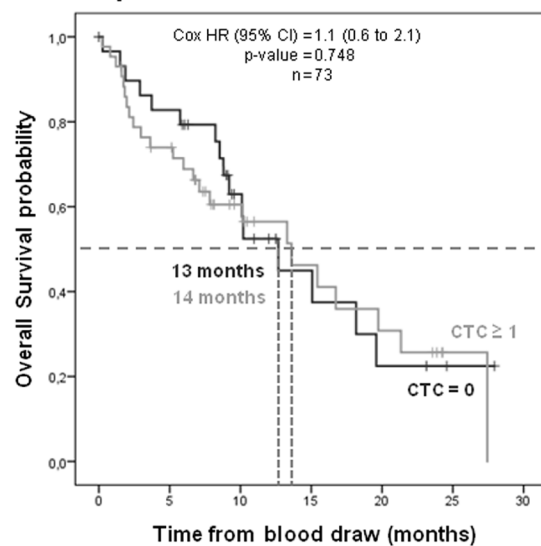

|                                  |    |    |    |   |   |   |   |
|----------------------------------|----|----|----|---|---|---|---|
| CTC = 0                          | 30 | 27 | 16 | 6 | 4 | 2 | 0 |
| CTC ≥ 1                          | 43 | 30 | 17 | 9 | 7 | 3 | 0 |
| Number of patients still at risk |    |    |    |   |   |   |   |

**Supplementary Figure 4: Overall survival for EpCAM<sup>low</sup> CTC.** Kaplan–Meier curves of 71 CRPC patients separated into four groups with both EpCAM<sup>high</sup> and EpCAM<sup>low</sup> CTC measured (A): 1. <5 EpCAM<sup>high</sup> CTC and <5 EpCAM<sup>low</sup> CTC (black solid line); 2. <5 EpCAM<sup>high</sup> CTC and ≥5 EpCAM<sup>low</sup> CTC (black dashed line); 3. ≥5 EpCAM<sup>high</sup> CTC and <5 EpCAM<sup>low</sup> CTC (grey solid line); and 4. ≥5 EpCAM<sup>high</sup> CTC and ≥5 EpCAM<sup>low</sup> CTC (grey dashed line). It shows a strong trend between EpCAM<sup>high</sup> CTC and survival, whereas the presence or absence of EpCAM<sup>low</sup> CTC has no influence on survival. The ROC curve indicated that the highest diagnostic ability for EpCAM<sup>low</sup> CTC is with a threshold of 1 CTC (B). The Kaplan-Meier curve for overall survival of EpCAM<sup>low</sup> CTC with 1 CTC threshold shows no correlation with survival ( $p = 0.748$ ) (C).

**Supplementary Table 1: Overview of CTC found in all CRPC and mBC patients.** Detailed overview of EpCAM<sup>high</sup> and EpCAM<sup>low</sup> CTC found in castrate-resistant prostate cancer patients and metastatic breast cancer patients. See Supplementary\_Table\_1
